# Supplementary material
Source: Research Square preprint supplement (doi:10.21203/rs.3.rs-10287106/v1)
Supplement: Supplementary file 1 [file 3a61ae0bb981be7aa88e8f7d.docx]

Supplementary material for

**Global controls on flood expansion and socioeconomic vulnerability**

Tuhin Mukherjee a, N. K. Goel a,b, D. S. Arya a, Manohar Arora b

a Department of Hydrology, Indian Institute of Technology Roorkee, Roorkee - 247667, Uttarakhand, India

b International Centre of Excellence for Dams, Indian Institute of Technology Roorkee, Roorkee- 247667, Uttarakhand, India

**Corresponding author: N. K. Goel;
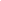
goelhy@gmail.com**

Prof. N. K. Goel,

International Centre of Excellence for Dams,

Indian Institute of Technology Roorkee,

Roorkee- 247667,

Uttarakhand, India


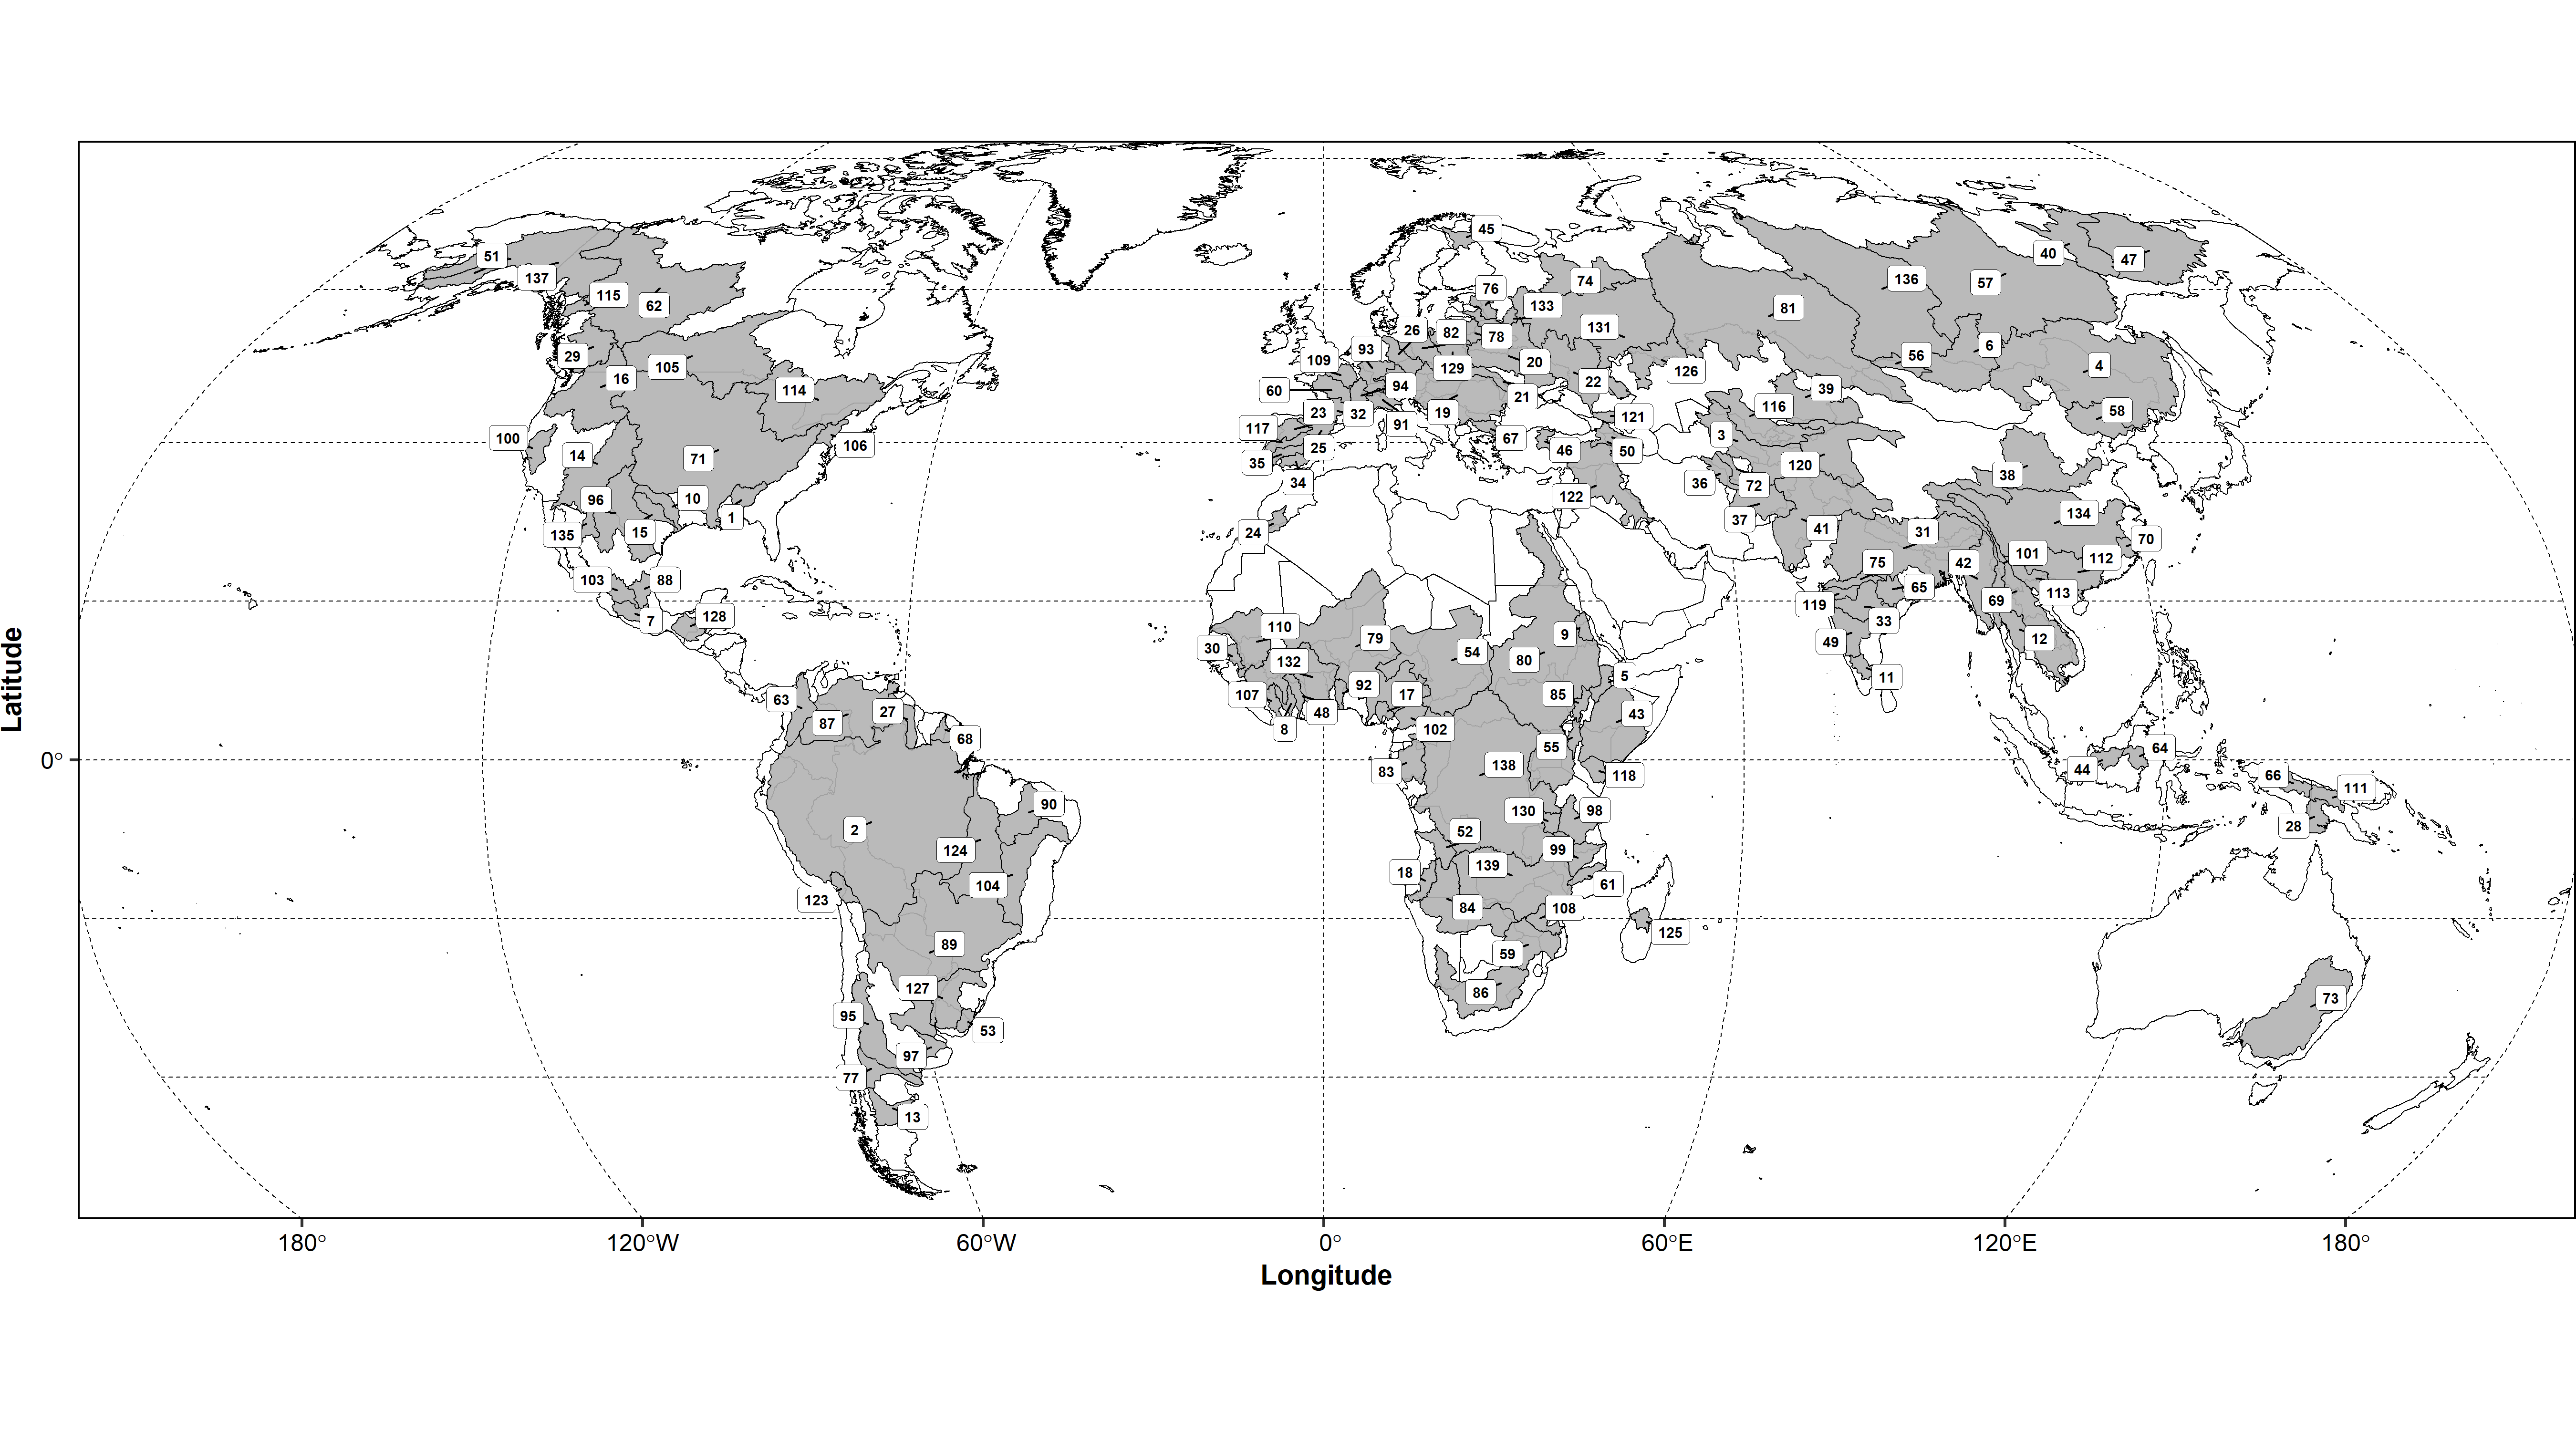

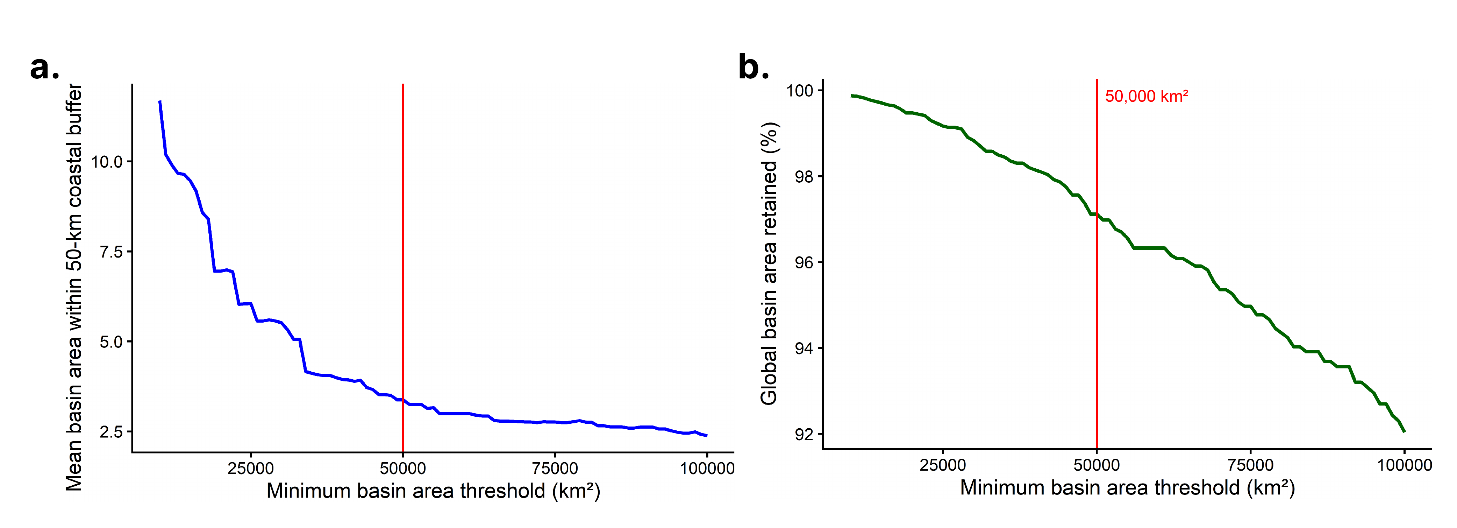


**Fig Supplementary_1:** Location of analysed river basins

**Fig Supplementary_2:** **Basin-area threshold analysis.** **a**. Sensitivity of the mean basin area located within the 50-km coastal buffer to the minimum basin area threshold. **b**. Percentage of the global basin area retained as the minimum basin area threshold increases.


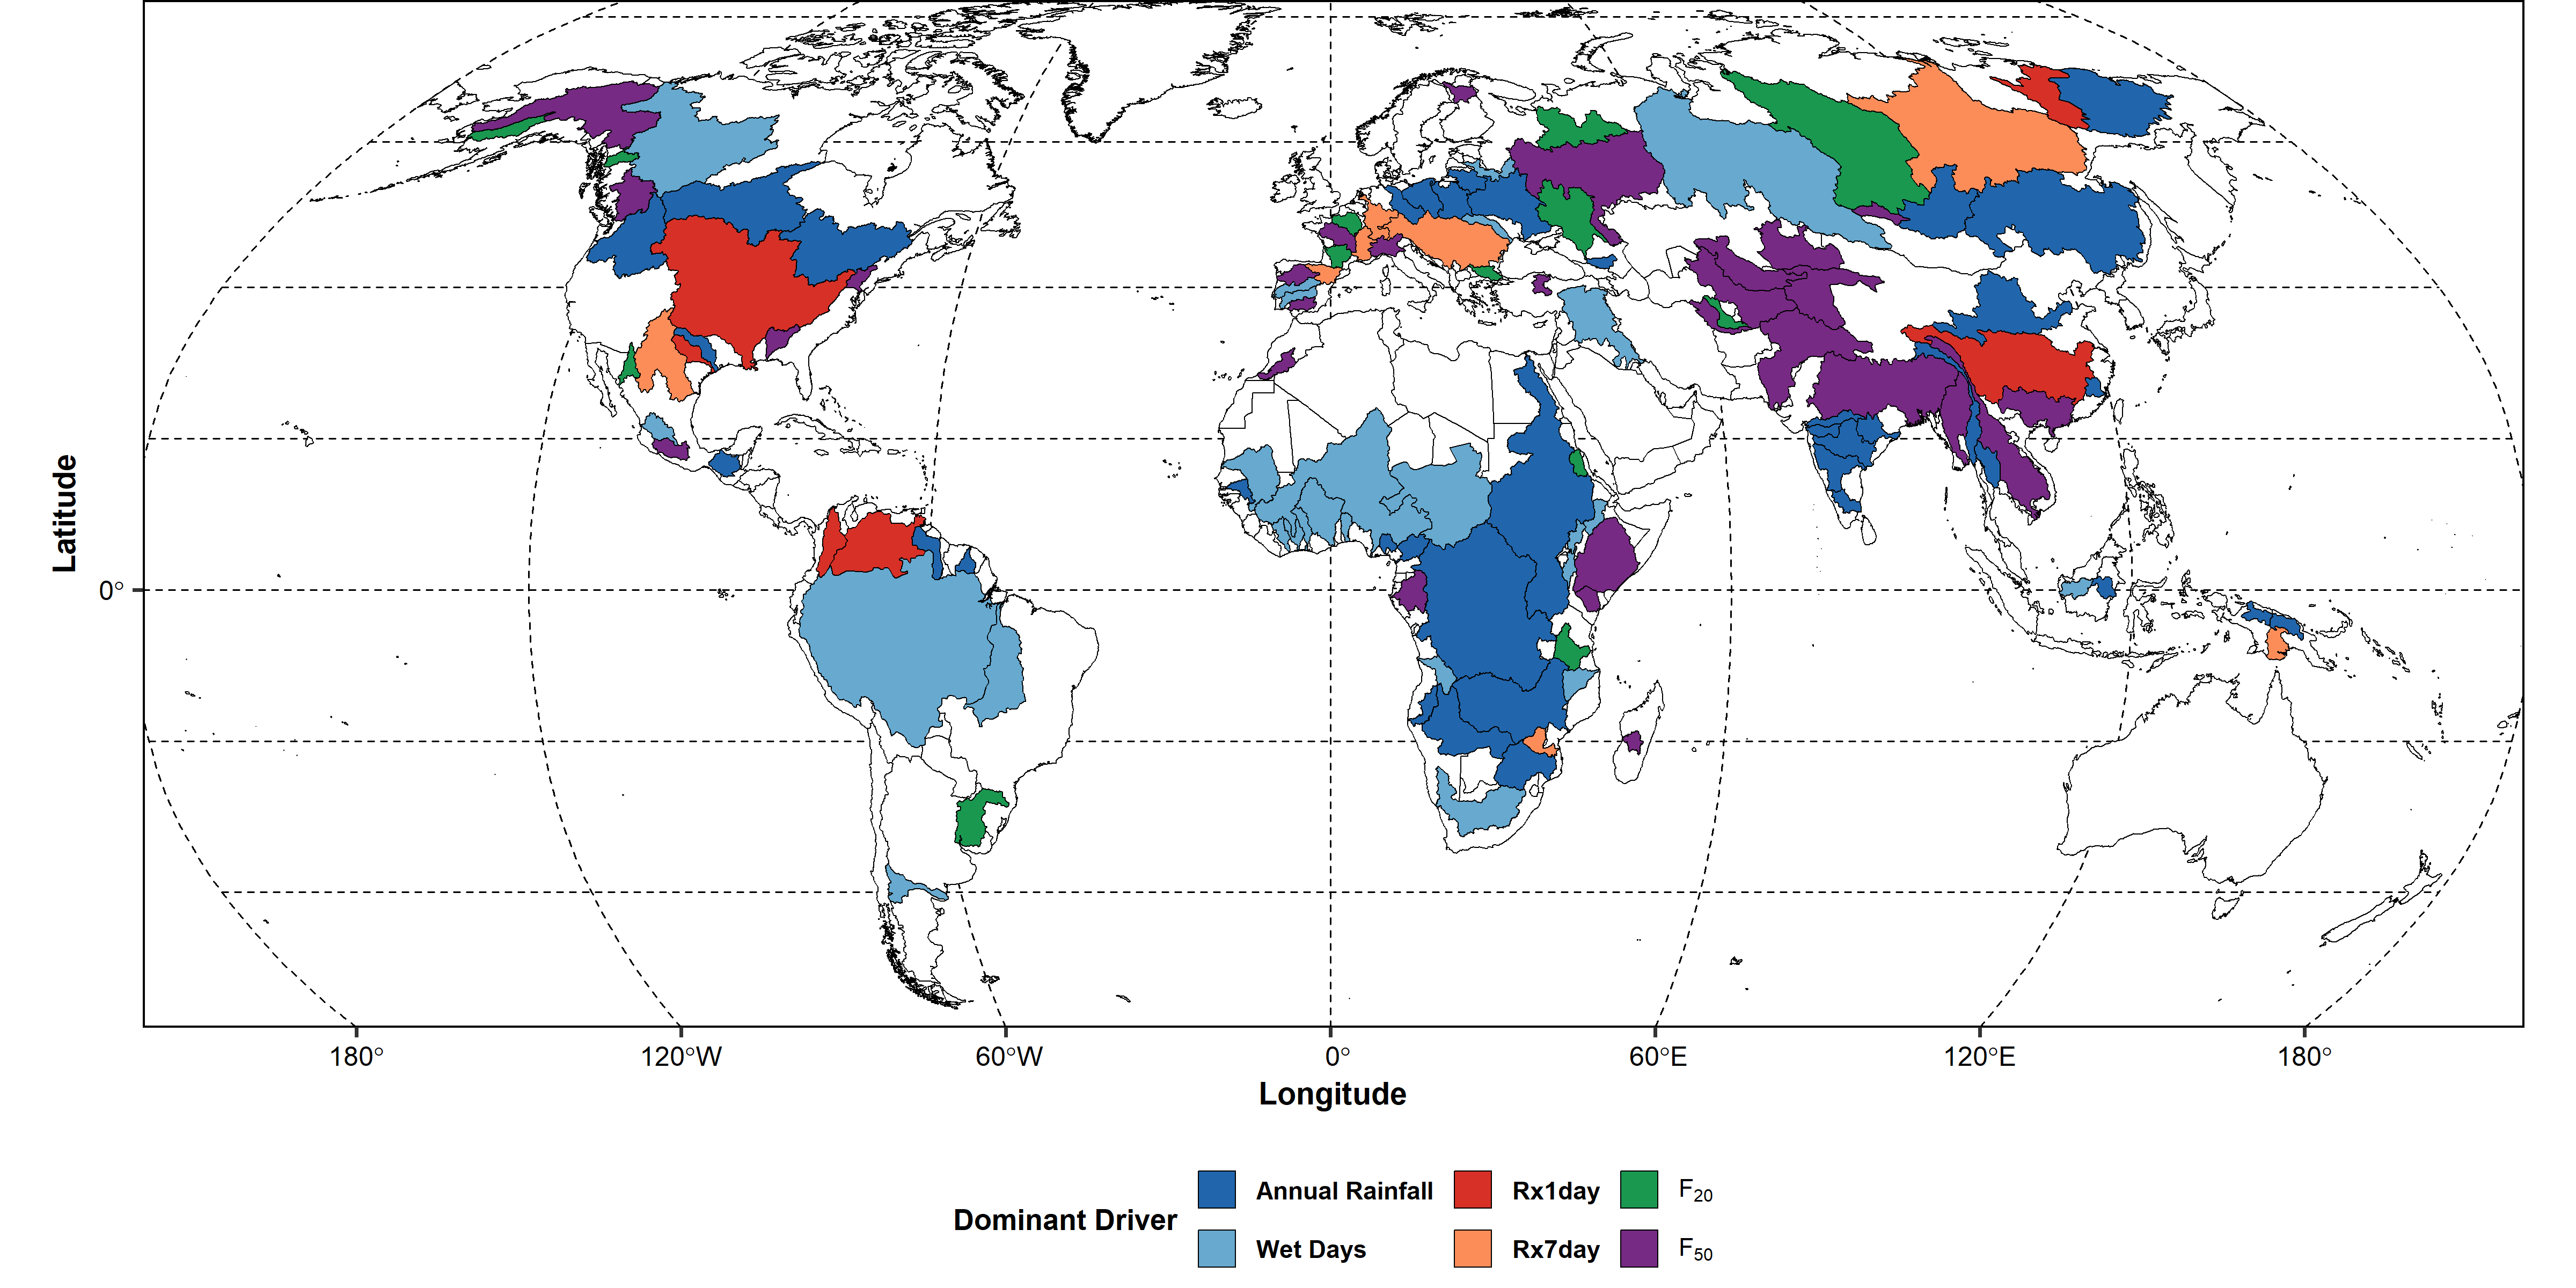


**Fig Supplementary_3:** **Global distribution of the dominant rainfall driver classes**: **annual rainfall** & **wet days: Rainfall Regime, maximum 1-day rainfall (Rx1day)** & **maximum consecutive 7-day rainfall (Rx7day)**: Extreme Rainfall, P**recipitation frequency greater than 50 mm/hr (F50) & 20 (F20) mm/hr: High-frequency rainfall**.


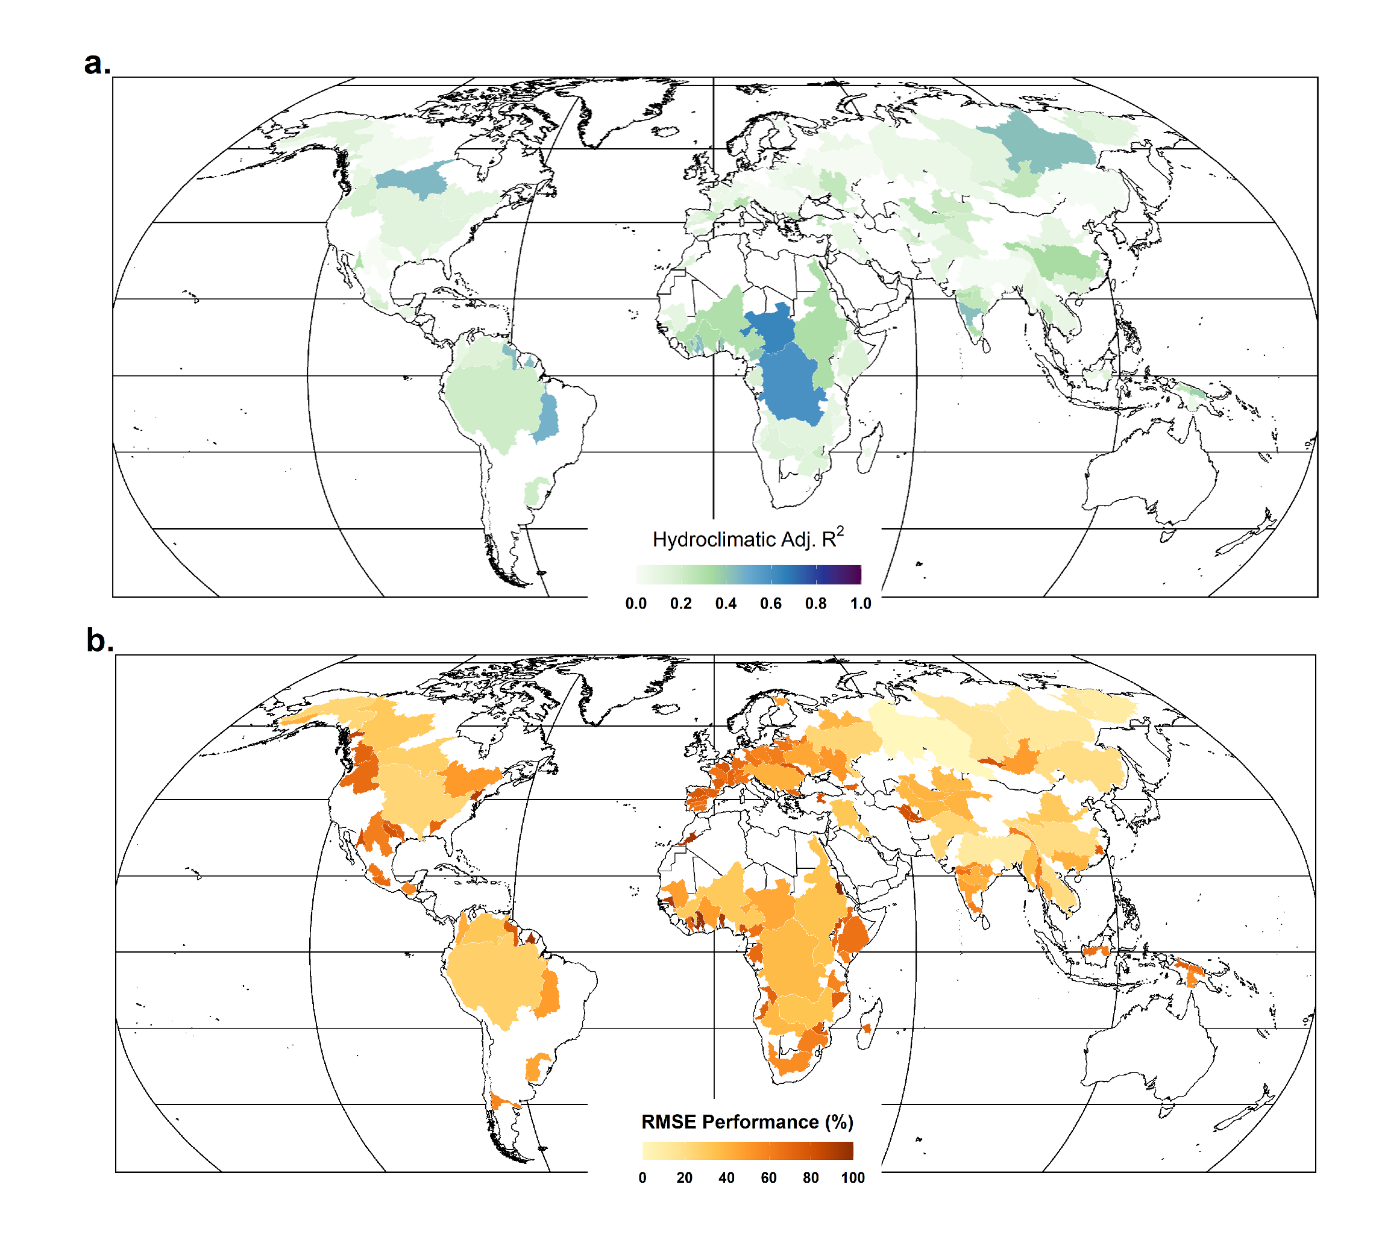


**Fig Supplementary_4: Outcome of multiple linear regression analysis between AMFE and hydro-climatic variables**: **rainfall & snowmelt.** **a.** Spatial distribution of the adjusted coefficient of determination (Adjusted R2) for combined hydro-climatic regression. **b.** The percentage reduction in root mean square error (RMSE) achieved by taking rainfall and snowmelt simultaneously.


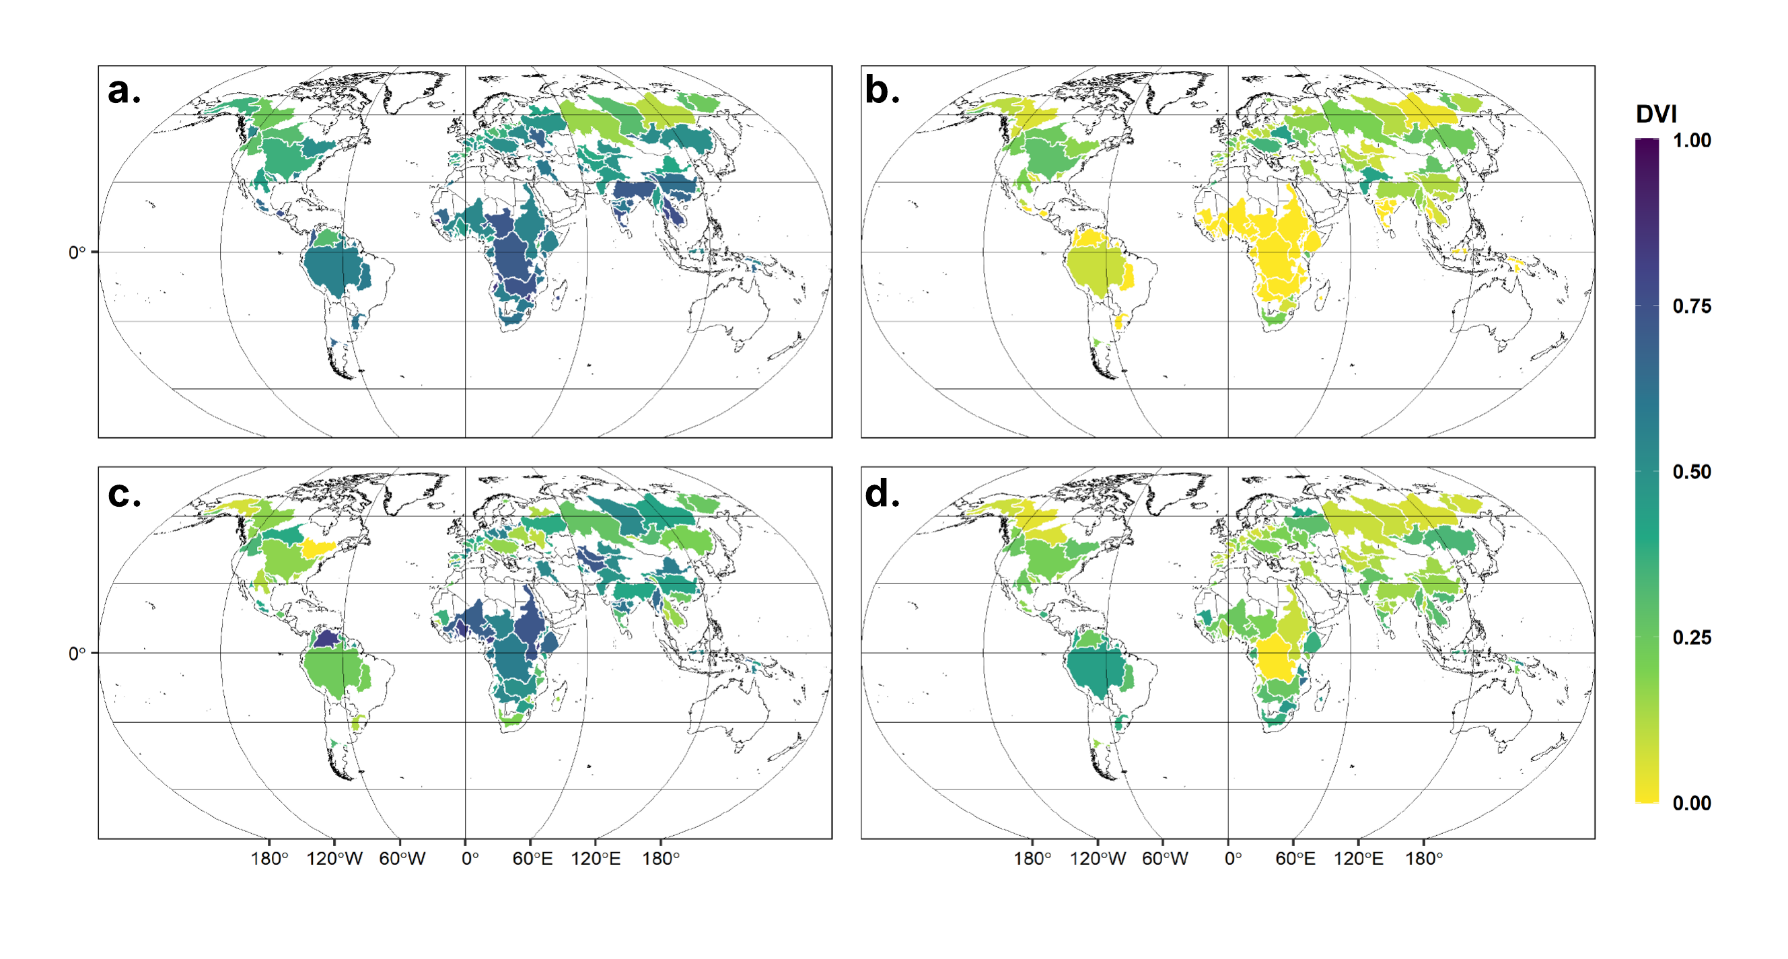

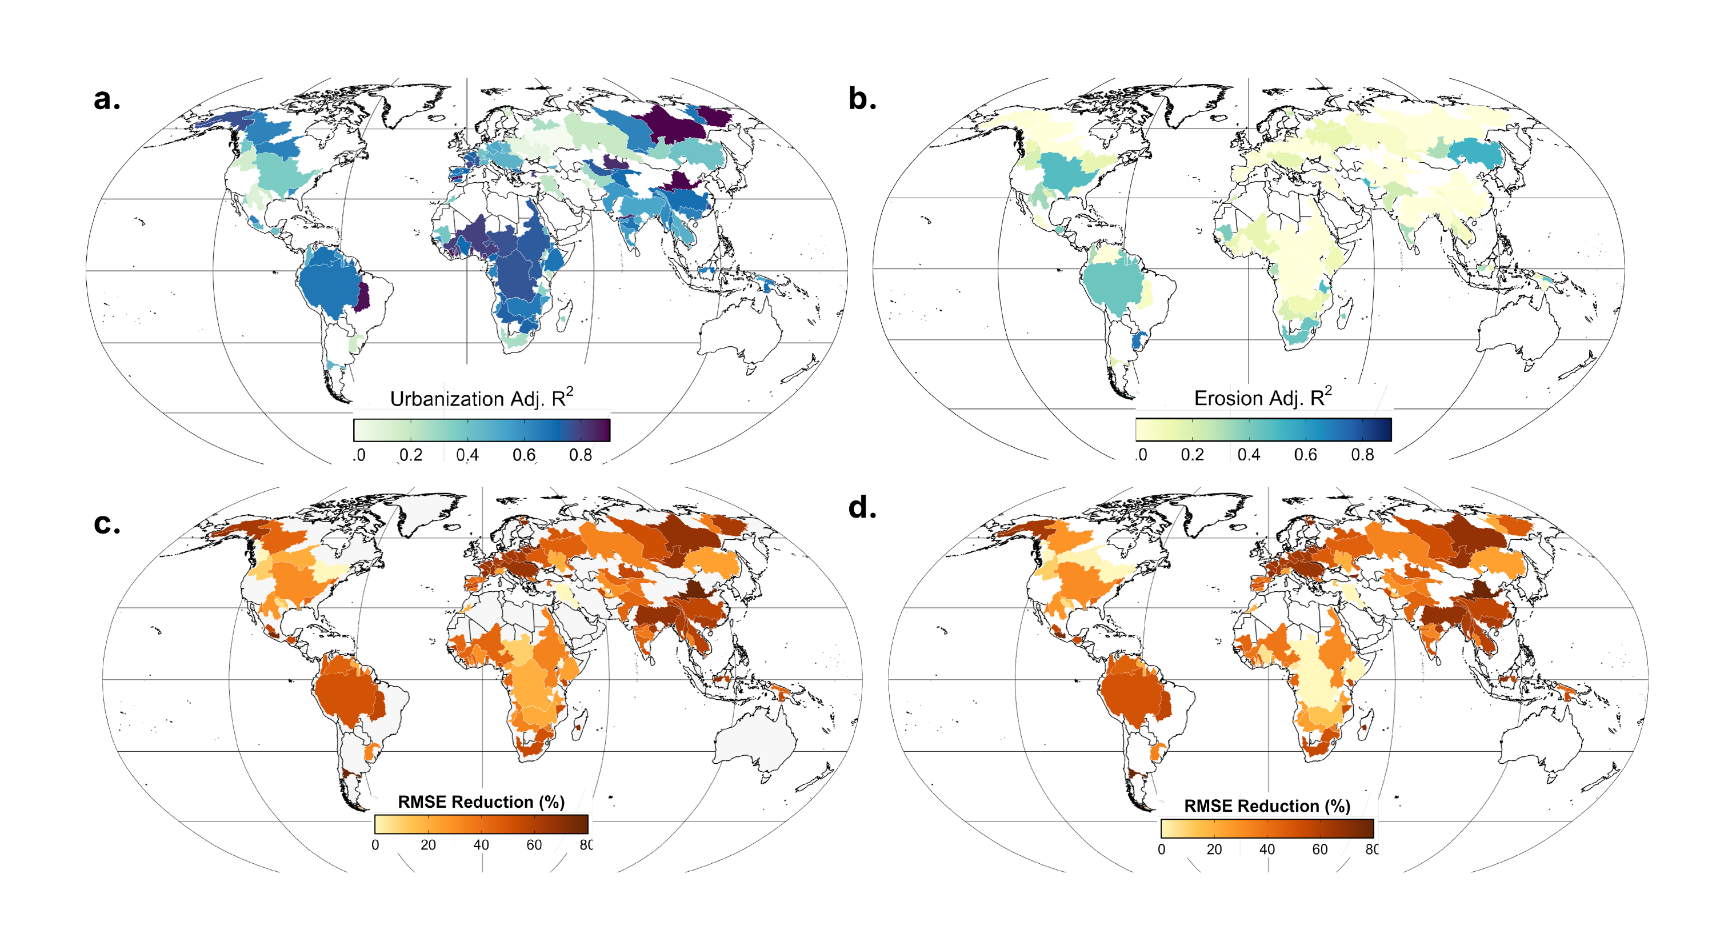


**Fig Supplementary_6:** **Spatial distribution of the DVI** for **a.** rainfall, **b.** snowmelt, **c.** urbanization, and **d.** floodplain erosion across the river basins.

**Fig Supplementary_5:** **Basin-wise performance attribution of multiple regression analysis between AMFE and impervious area, floodplain erosion.** Spatial distribution of the adjusted coefficient of determination (Adjusted R2) for **a.** urbanization-based regression model. **b**. floodplain erosion-based. Percentage reduction in root mean square error (RMSE) achieved by including **c.** urbanization in the regression analysis **d.** long-term erosion within the floodplains.


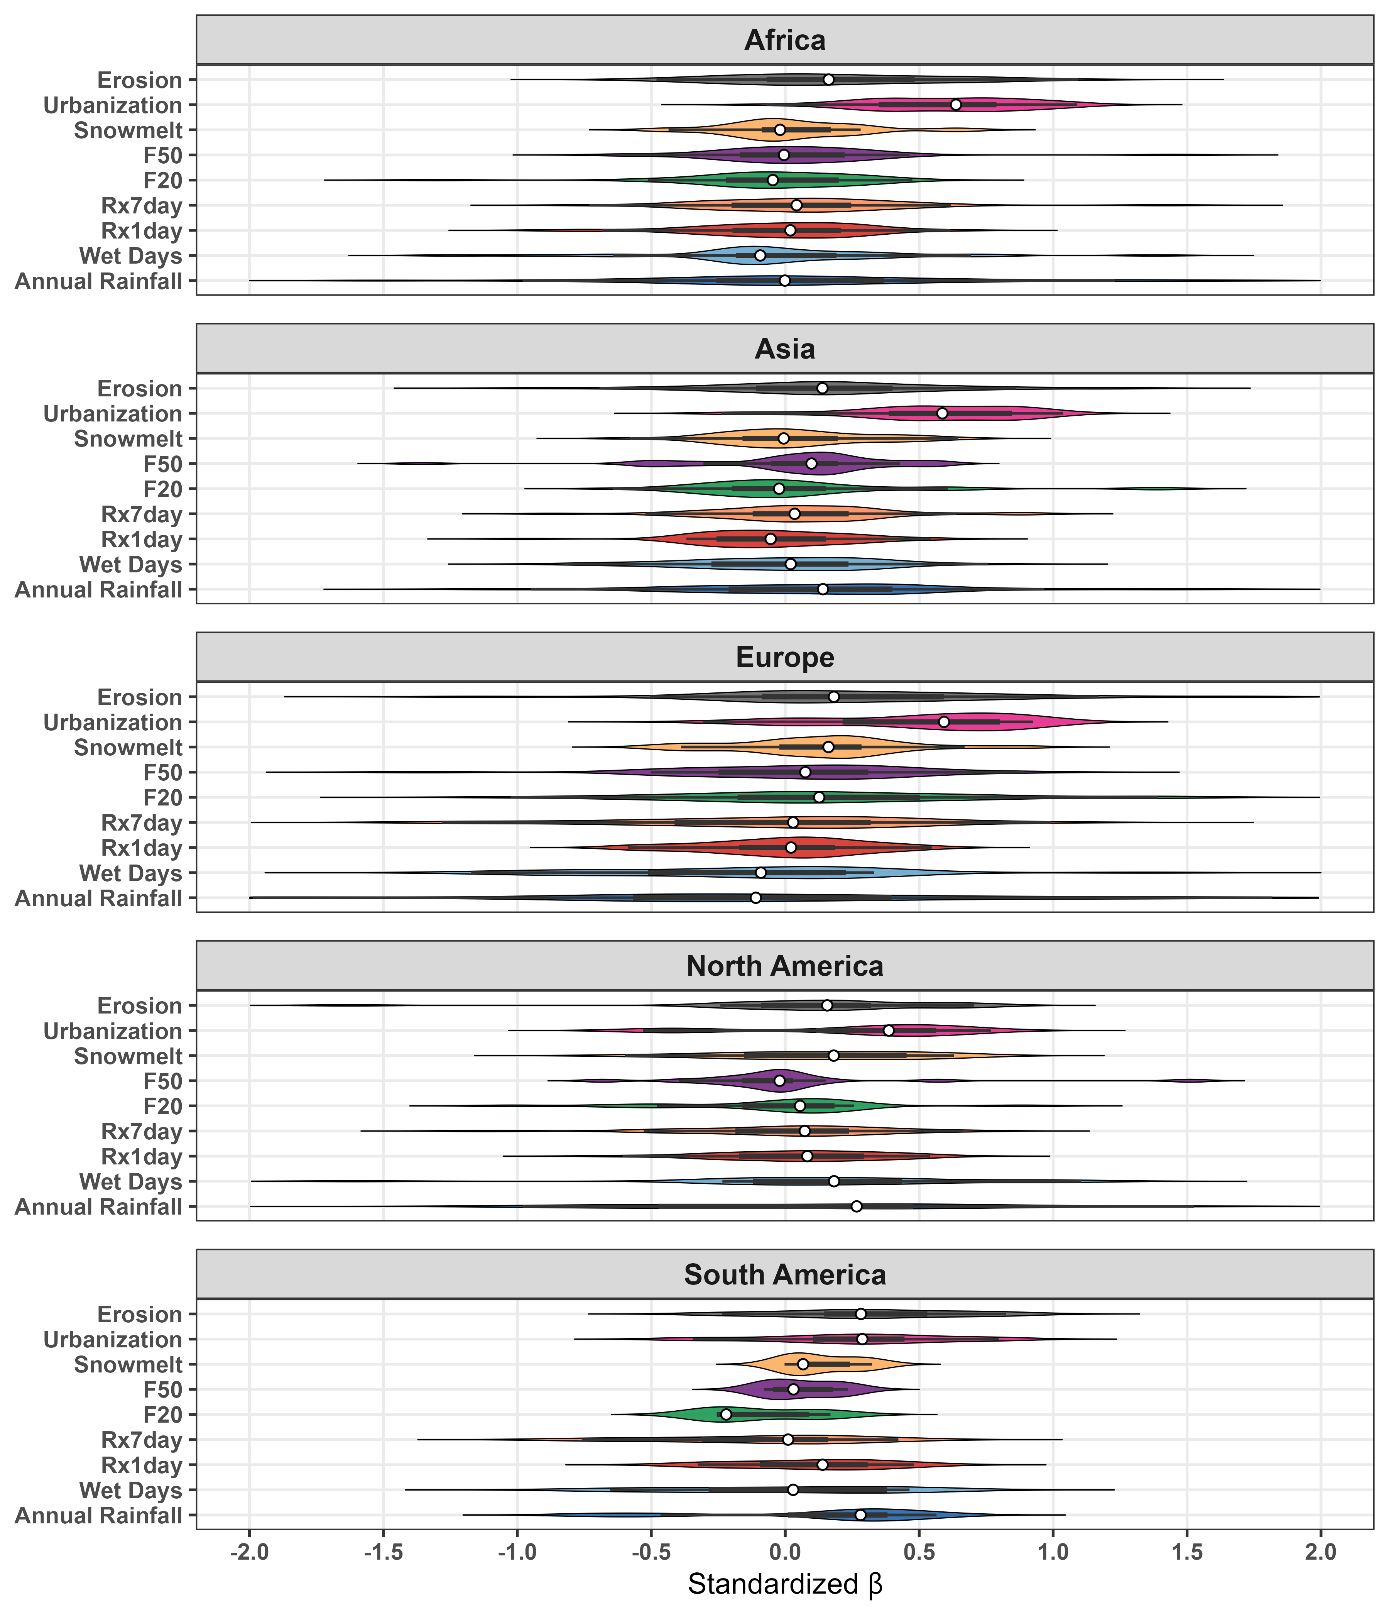


**Fig Supplementary_7**: **Sensitivity of AMFE to the drivers analyzed in this study with Continental variation:** Violin plots show the distribution of standardized regression coefficients (β) for all the drivers using a common scale (−2 to 2) to facilitate comparison of driver sensitivity among continents. Here, positive β values indicate a positive association between the particular driver and flood extent, whereas negative values indicate an inverse association.

**Supplementary Table_1:** Basin-wise basic information with normalized Theil-Sen slope values

| **SL. No.** | **Basin** | **Country** | **Continent** | **Basin Area** | **AMFE Trend (Normalized)** |
| --- | --- | --- | --- | --- | --- |
| 1 | Alabama | United States of America | North America | 113851.748 | 1.1 |
| 2 | Amazon | Brazil | South America | 6035836.59 | 0.977 |
| 3 | Amu_Darya | Uzbekistan | Asia | 611455.044 | 1.712 |
| 4 | Amur | China | Asia | 2214942.78 | 1.35 |
| 5 | Awash | Ethiopia | Africa | 91536.2543 | 3.715 |
| 6 | Baikal | Russian Federation | Asia | 588895.504 | 4.283 |
| 7 | Balsas | Mexico | North America | 119007.819 | 1.373 |
| 8 | Bandama | Côte d'Ivoire | Africa | 65965.6672 | 6.043 |
| 9 | Baraka | Eritrea | Africa | 68421.0321 | 6.976 |
| 10 | Brazos | United States of America | North America | 121188.026 | 1.181 |
| 11 | Cauvery | India | Asia | 91055.9064 | 3.229 |
| 12 | Chao_Phraya | Thailand | Asia | 151454.497 | 3.868 |
| 13 | Colorado_River | United States of America | North America | 112243.398 | 0.621 |
| 14 | Columbia | United States of America | North America | 670165.232 | 0.362 |
| 15 | Cross | Nigeria | Africa | 53928.489 | 6.699 |
| 16 | Cunene | Angola | Africa | 109645.612 | 4.346 |
| 17 | Danube | Romania | Europe | 801830.229 | 2.224 |
| 18 | Dnieper | Ukraine | Europe | 534766.621 | 0.7 |
| 19 | Dniester | Moldova, Republic of | Europe | 75005.2722 | 0.984 |
| 20 | Don | Russian Federation | Europe | 487409.781 | 0.801 |
| 21 | Douro_Duero | Spain | Europe | 97320.371 | 4.973 |
| 22 | Dra | Morocco | Africa | 93077.0132 | 4.036 |
| 23 | Ebro | Spain | Europe | 86178.7192 | 5.748 |
| 24 | Elbe | Germany | Europe | 115016.688 | 2.724 |
| 25 | Essequibo | Guyana | South America | 164853.141 | 2.534 |
| 26 | Fly | Papua New Guinea | Asia | 133141.699 | 3.642 |
| 27 | Fraser | Canada | North America | 240935.03 | 0.506 |
| 28 | Gambia | Senegal | Africa | 69573.4134 | 2.939 |
| 29 | Ganges_Brahmaputra | India | Asia | 1662309.01 | 2.273 |
| 30 | Garonne | France | Europe | 81441.1879 | 3.765 |
| 31 | Godavari | India | Asia | 319822.737 | 3.582 |
| 32 | Guadalquivir | Spain | Europe | 55890.1226 | 5.273 |
| 33 | Guadiana | Spain | Europe | 71183.4168 | 6.028 |
| 34 | Hari_Rud | Iran (Islamic Republic of) | Asia | 126308.486 | 0.859 |
| 35 | Hwang_Ho | China | Asia | 881193.03 | 4.421 |
| 36 | Ili | Kazakhstan | Asia | 478989.649 | 5.202 |
| 37 | Indigirka | Russian Federation | Asia | 330454.656 | 6.813 |
| 38 | Indus | Pakistan | Asia | 1030602.33 | 3.756 |
| 39 | Irrawaddy | Myanmar | Asia | 386956.718 | 3.693 |
| 40 | Jubba_Shebelle | Ethiopia | Africa | 799531.426 | 6.225 |
| 41 | Kapuas | Indonesia | Asia | 102481.262 | 3.469 |
| 42 | Kemijoki | Finland | Europe | 52270.0093 | 0.424 |
| 43 | Kizil | Turkey | Asia | 50999.2037 | 6.885 |
| 44 | Kolyma | Russian Federation | Asia | 750966.176 | 6.832 |
| 45 | Komoe | Côte d'Ivoire | Africa | 77884.3556 | 4.373 |
| 46 | Krishna | India | Asia | 251616.092 | 2.63 |
| 47 | Kuskokwim | United States of America | North America | 118428.059 | 4.949 |
| 48 | Kwanza | Angola | Africa | 140895.234 | 4.905 |
| 49 | Lake_Chad | Chad | Africa | 1496451.3 | 5.475 |
| 50 | Lake_Turkana | Kenya | Africa | 72008.3663 | 5.194 |
| 51 | Lake_Ubsa | Mongolia | Asia | 91906.1875 | 3.346 |
| 52 | Lena | Russian Federation | Asia | 2418594.7 | 5.944 |
| 53 | Limpopo | South Africa | Africa | 413588.226 | 3.944 |
| 54 | Loire | France | Europe | 114546.432 | 5.019 |
| 55 | Mackenzie | Canada | North America | 1537734.04 | 0.538 |
| 56 | Magdalena | Colombia | South America | 232210.975 | 2.734 |
| 57 | Mahakam | Indonesia | Asia | 80154.0778 | 4.985 |
| 58 | Mahanadi | India | Asia | 149124.307 | 2.754 |
| 59 | Mamberamo | Indonesia | Asia | 81441.1374 | 4.031 |
| 60 | Maritsa | Bulgaria | Europe | 55913.0732 | 5.105 |
| 61 | Maroni | Suriname | South America | 67384.0319 | 3.313 |
| 62 | Mekong | Lao People's Democratic Republic | Asia | 801871.257 | 3.01 |
| 63 | Min | China | Asia | 61075.0561 | 4.023 |
| 64 | Mississippi | United States of America | North America | 3228837.76 | 1.034 |
| 65 | Murghab | Turkmenistan | Asia | 86114.5017 | 1.166 |
| 66 | N._Dvina | Russian Federation | Europe | 361612.307 | 1.717 |
| 67 | Narmada | India | Asia | 95805.0854 | 4.872 |
| 68 | Negro | Argentina | South America | 160593.28 | 2.16 |
| 69 | Neman | Lithuania | Europe | 99990.6505 | 1.046 |
| 70 | Niger | Niger | Africa | 2197201.53 | 4.687 |
| 71 | Nile | Sudan | Africa | 3057386.04 | 4.087 |
| 72 | Ob | Russian Federation | Asia | 3085473.8 | 2.541 |
| 73 | Oder | Poland | Europe | 164966.703 | 2.148 |
| 74 | Ogooue | Gabon | Africa | 221215.356 | 6.728 |
| 75 | Okavango | Angola | Africa | 692212.694 | 3.893 |
| 76 | Omo_Wenz | Ethiopia | Africa | 68814.7705 | 6.627 |
| 77 | Orange | South Africa | Africa | 620400.699 | 2.057 |
| 78 | Orinoco | Colombia | South America | 934462.154 | 3.912 |
| 79 | Po | Italy | Europe | 97029.2198 | 5.551 |
| 80 | Queme | Benin | Africa | 54663.1444 | 6.27 |
| 81 | Rhine | Germany | Europe | 151484.36 | 1.9 |
| 82 | Rhone | France | Europe | 94619.3771 | 4.42 |
| 83 | Rio_Grande | United States of America | North America | 641609.343 | 0.782 |
| 84 | Rufiji | United Republic of Tanzania | Africa | 203543.858 | 2.674 |
| 85 | Ruvuma | Mozambique | Africa | 152338.566 | 2.591 |
| 86 | Salween | China | Asia | 249040.745 | 3.598 |
| 87 | Sanaga | Cameroon | Africa | 133894.783 | 6.272 |
| 88 | Santiago_Lerma_Chapala | Mexico | North America | 126031.083 | 2.746 |
| 89 | Saskatchewan_Nelson | Canada | North America | 1138155.18 | 1.61 |
| 90 | Sasquehanna | United States of America | North America | 68059.4892 | 0.337 |
| 91 | Sassandra | Côte d'Ivoire | Africa | 69140.8712 | 5.922 |
| 92 | Save | Zimbabwe | Africa | 113497.196 | 3.328 |
| 93 | Seine | France | Europe | 79680.4413 | 4.321 |
| 94 | Senegal | Mali | Africa | 434749.168 | 4.446 |
| 95 | Sepik | Papua New Guinea | Asia | 99824.7014 | 5.316 |
| 96 | Si | China | Asia | 459249.348 | 3.246 |
| 97 | St._Lawrence | Canada | North America | 1055492.84 | 0.156 |
| 98 | Stikine | Canada | North America | 52500.3996 | 0.827 |
| 99 | Syr_Darya | Kazakhstan | Asia | 429848.119 | 3.287 |
| 100 | Tagus | Spain | Europe | 78836.1631 | 4.447 |
| 101 | Tana | Norway | Europe | 95030.4395 | 0.486 |
| 102 | Tapti | India | Asia | 73779.6053 | 2.577 |
| 103 | Tarim_(Yarkand) | China | Asia | 580935.359 | 4.096 |
| 104 | Terek | Russian Federation | Europe | 50623.5647 | 1.912 |
| 105 | Tigris_Euphrates | Iraq | Asia | 600308.756 | 2.578 |
| 106 | Tocantins | Brazil | South America | 776767.438 | 2.303 |
| 107 | Tsiribihina | Madagascar | Africa | 61668.2296 | 1.263 |
| 108 | Uruguay | Brazil | South America | 343285.084 | 0.92 |
| 109 | Usumacinta | Mexico | North America | 126435.883 | 2.216 |
| 110 | Vistula | Poland | Europe | 183927.728 | 2.244 |
| 111 | Volga | Russian Federation | Europe | 1393845.1 | 0.982 |
| 112 | Volta | Ghana | Africa | 412484.575 | 5.408 |
| 113 | W._Dvina | Russian Federation | Europe | 83871.1955 | 0.63 |
| 114 | Yangtze | China | Asia | 1709103.86 | 3.541 |
| 115 | Yaqui | Mexico | North America | 78883.9737 | 2.294 |
| 116 | Yenisey | Russian Federation | Asia | 1926905.32 | 3.523 |
| 117 | Yukon | United States of America | North America | 834934.967 | 3.386 |
| 118 | Zaire | Democratic Republic of the Congo | Africa | 3679282.33 | 3.487 |
| 119 | Zambezi | Zambia | Africa | 1381196.25 | 4.446 |

**Supplementary Table_2:** Socio-economic characteristics of the analyzed river basins in this study

| **SL. No.** | **Basin** | **Mean Population Density per km2 (2020)** | **Mean Population Density Trend (%/ yr)** | **Average GDP in Dollars per Capita (2024)** |
| --- | --- | --- | --- | --- |
| 1 | Alabama | 41.2 | -0.8 | 47214.5 |
| 2 | Amazon | 5.9 | -0.8 | 14217.7 |
| 3 | Amu_Darya | 54.3 | 1.4 | 7169.4 |
| 4 | Amur | 30.2 | -1.8 | 22430.3 |
| 5 | Awash | 239.3 | 2.5 | 2752.5 |
| 6 | Baikal | 5.9 | -1.5 | 14052 |
| 7 | Balsas | 115.1 | 0.4 | 13455.9 |
| 8 | Bandama | 70.3 | 2.2 | 6082.7 |
| 9 | Baraka | 25.8 | 1.8 | 1150.7 |
| 10 | Brazos | 28.4 | -0.8 | 47461.8 |
| 11 | Cauvery | 512.7 | 2.3 | 15895.4 |
| 12 | Chao_Phraya | 192.2 | 1.1 | 10869.5 |
| 13 | Colorado_River | 22.5 | -1.3 | 80276.6 |
| 14 | Columbia | 13 | -1.6 | 52391.2 |
| 15 | Cross | 261.5 | 2.3 | 4989.9 |
| 16 | Cunene | 35.2 | 4.7 | 6511.4 |
| 17 | Danube | 94.4 | -0.8 | 35314.8 |
| 18 | Dnieper | 54.3 | -1.2 | 17521.1 |
| 19 | Dniester | 85.9 | -0.9 | 11185 |
| 20 | Don | 38.5 | -0.3 | 19277.1 |
| 21 | Douro_Duero | 52.3 | -0.9 | 8336.2 |
| 22 | Dra | 11.3 | -1.1 | 8336.2 |
| 23 | Ebro | 42.2 | -0.1 | 62406.4 |
| 24 | Elbe | 152.6 | -0.6 | 47691.6 |
| 25 | Essequibo | 1.3 | -0.6 | 19252.8 |
| 26 | Fly | 5.2 | 2 | 4724 |
| 27 | Fraser | 6 | -2.4 | 37043 |
| 28 | Gambia | 36.7 | 3 | 2920 |
| 29 | Ganges_Brahmaputra | 489.1 | 1.4 | 9970.4 |
| 30 | Garonne | 67.7 | 0.7 | 46706.6 |
| 31 | Godavari | 280.8 | 2.2 | 11282.4 |
| 32 | Guadalquivir | 82 | 0.6 | 42120.5 |
| 33 | Guadiana | 25.2 | -0.1 | 46276.8 |
| 34 | Hari_Rud | 71.6 | 2.5 | 8960 |
| 35 | Hwang_Ho | 196.8 | 1 | 27517.8 |
| 36 | Ili | 21.2 | -0.2 | 29783.6 |
| 37 | Indigirka | 0.1 | -2.3 | 58328.8 |
| 38 | Indus | 234.6 | 0.7 | 8036.2 |
| 39 | Irrawaddy | 91.2 | 1.3 | 5494.9 |
| 40 | Jubba_Shebelle | 33.7 | 3.5 | 2748.6 |
| 41 | Kapuas | 20.4 | 1.6 | 9830 |
| 42 | Kemijoki | 2.3 | -1.5 | 59282.4 |
| 43 | Kizil | 39.6 | -0.2 | 28899 |
| 44 | Kolyma | 0.1 | -3.3 | 63888.7 |
| 45 | Komoe | 50.3 | 3.2 | 4996.3 |
| 46 | Krishna | 364.6 | 2.2 | 13115.8 |
| 47 | Kuskokwim | 0.1 | -1.1 | 58949.9 |
| 48 | Kwanza | 27.2 | 2.1 | 5095.6 |
| 49 | Lake_Chad | 34.3 | 3.3 | 2291.3 |
| 50 | Lake_Turkana | 29.5 | 1.9 | 2682 |
| 51 | Lake_Ubsa | 1.6 | -1.3 | 10171.8 |
| 52 | Lena | 0.5 | -2.1 | 66767.7 |
| 53 | Limpopo | 50.7 | 2.4 | 9911.6 |
| 54 | Loire | 69.8 | 0.4 | 48363.8 |
| 55 | Mackenzie | 0.3 | -2.8 | 78240.1 |
| 56 | Magdalena | 116.1 | 2.5 | 14159.2 |
| 57 | Mahakam | 28.2 | 2.8 | 28012.4 |
| 58 | Mahanadi | 308.1 | 2.2 | 7484.4 |
| 59 | Mamberamo | 9.7 | 5.5 | 12221.1 |
| 60 | Maritsa | 87.6 | -0.6 | 31565 |
| 61 | Maroni | 1.2 | 2.9 | 17163.3 |
| 62 | Mekong | 79.2 | 0.8 | 8318.7 |
| 63 | Min | 160.3 | -0.1 | 33268.9 |
| 64 | Mississippi | 25.3 | -1.6 | 55024.8 |
| 65 | Murghab | 30.1 | 3.3 | 11196.3 |
| 66 | N._Dvina | 4.9 | -2.4 | 34845.2 |
| 67 | Narmada | 253.8 | 2.9 | 8744.7 |
| 68 | Negro | 7.4 | 2.1 | 36479.5 |
| 69 | Neman | 47.3 | -0.5 | 33896.7 |
| 70 | Niger | 68.7 | 2.8 | 4794.2 |
| 71 | Nile | 90.1 | 2.8 | 2957.7 |
| 72 | Ob | 8.9 | -0.8 | 88990.9 |
| 73 | Oder | 135.8 | -0.5 | 41258.5 |
| 74 | Ogooue | 4.4 | 3.7 | 18026.1 |
| 75 | Okavango | 5.5 | 1.2 | 10408 |
| 76 | Omo_Wenz | 218.2 | 3.9 | 2812.4 |
| 77 | Orange | 25.1 | -0.4 | 11537.9 |
| 78 | Orinoco | 25.3 | 2.9 | 8441.4 |
| 79 | Po | 204.9 | -1 | 66437.3 |
| 80 | Queme | 141.8 | 3.5 | 3639.1 |
| 81 | Rhine | 314.1 | -0.1 | 63686.8 |
| 82 | Rhone | 118.9 | 0.5 | 51704.8 |
| 83 | Rio_Grande | 25.1 | -1.2 | 56519.1 |
| 84 | Rufiji | 28 | 0.7 | 3241.2 |
| 85 | Ruvuma | 22.7 | 3.1 | 1568.3 |
| 86 | Salween | 28.3 | 1.2 | 9750.7 |
| 87 | Sanaga | 37.5 | 3.1 | 4380.1 |
| 88 | Santiago_Lerma_Chapala | 169.1 | 0.9 | 19654.8 |
| 89 | Saskatchewan_Nelson | 6.7 | -1.8 | 49591.5 |
| 90 | Sasquehanna | 57.1 | -0.8 | 58210.2 |
| 91 | Sassandra | 80.2 | 2.7 | 5908.7 |
| 92 | Save | 35.4 | 3.3 | 2324.5 |
| 93 | Seine | 218.4 | 0.3 | 50747.7 |
| 94 | Senegal | 18.7 | 1.3 | 3324.3 |
| 95 | Sepik | 27.2 | 1.7 | 3345.3 |
| 96 | Si | 278.4 | 0.6 | 17839.9 |
| 97 | St. Lawrence | 61.2 | -0.8 | 50836.8 |
| 98 | Stikine | 0 | -2.9 | 31972.5 |
| 99 | Syr_Darya | 61.8 | 1 | 11834.6 |
| 100 | Tagus | 143.7 | -0.5 | 48167.9 |
| 101 | Tana | 54.3 | 1.2 | 23642 |
| 102 | Tapti | 372.7 | 2.7 | 12570.6 |
| 103 | Tarim_(Yarkand) | 19.3 | -1.5 | 13289 |
| 104 | Terek | 81.9 | 0.7 | 13043.3 |
| 105 | Tigris_Euphrates | 97.6 | 1.1 | 14110.1 |
| 106 | Tocantins | 7.8 | -1.4 | 23826.4 |
| 107 | Tsiribihina | 72 | 2.7 | 1513.7 |
| 108 | Uruguay | 16 | 0 | 27770.3 |
| 109 | Usumacinta | 79.1 | 2.2 | 8851.5 |
| 110 | Vistula | 135.6 | -0.2 | 34626.7 |
| 111 | Volga | 44.4 | -0.9 | 25907.4 |
| 112 | Volta | 78.8 | 3.5 | 3585.4 |
| 113 | W._Dvina | 26.3 | -1.1 | 21793.7 |
| 114 | Yangtze | 234.2 | 0.7 | 18981 |
| 115 | Yaqui | 8.9 | -1.8 | 31118.5 |
| 116 | Yenisey | 2.4 | -1.7 | 37099.5 |
| 117 | Yukon | 0.2 | -2.9 | 66500.8 |
| 118 | Zaire | 33 | 2.7 | 2002.6 |
| 119 | Zambezi | 38 | 3.1 | 3700.1 |

**Supplementary Table_3:** Dominant rainfall and overall AMFE drivers

| **SL. No.** | **Basin** | **Rainfall Driver** | **Dominant Driver** |
| --- | --- | --- | --- |
| 1 | Alabama | F50 | Rainfall |
| 2 | Amazon | Wet Days | Erosion |
| 3 | Amu_Darya | F50 | Urbanization |
| 4 | Amur | Annual Rainfall | Erosion |
| 5 | Awash | Wet Days | Urbanization |
| 6 | Baikal | Annual Rainfall | Erosion |
| 7 | Balsas | F50 | Rainfall |
| 8 | Bandama | Wet Days | Urbanization |
| 9 | Baraka | F20 | Urbanization |
| 10 | Brazos | Annual Rainfall | Rainfall |
| 11 | Cauvery | Annual Rainfall | Rainfall |
| 12 | Chao_Phraya | Annual Rainfall | Rainfall |
| 13 | Colorado_River | Rx1day | Rainfall |
| 14 | Columbia | Annual Rainfall | Urbanization |
| 15 | Cross | Annual Rainfall | Urbanization |
| 16 | Cunene | Annual Rainfall | Rainfall |
| 17 | Danube | Rx7day | Snow |
| 18 | Dnieper | Annual Rainfall | Snow |
| 19 | Dniester | Wet Days | Rainfall |
| 20 | Don | F20 | Rainfall |
| 21 | Douro_Duero | F50 | Urbanization |
| 22 | Dra | F50 | Snow |
| 23 | Ebro | Rx7day | Urbanization |
| 24 | Elbe | Annual Rainfall | Urbanization |
| 25 | Essequibo | Annual Rainfall | Erosion |
| 26 | Fly | Rx7day | Urbanization |
| 27 | Fraser | F50 | Rainfall |
| 28 | Gambia | Annual Rainfall | Rainfall |
| 29 | Ganges_Brahmaputra | F50 | Rainfall |
| 30 | Garonne | F20 | Urbanization |
| 31 | Godavari | Annual Rainfall | Urbanization |
| 32 | Guadalquivir | F50 | Urbanization |
| 33 | Guadiana | Wet Days | Urbanization |
| 34 | Hari_Rud | F50 | Erosion |
| 35 | Hwang_Ho | Annual Rainfall | Urbanization |
| 36 | Ili | F50 | Urbanization |
| 37 | Indigirka | Rx1day | Snow |
| 38 | Indus | F50 | Urbanization |
| 39 | Irrawaddy | F50 | Urbanization |
| 40 | Jubba_Shebelle | F50 | Urbanization |
| 41 | Kapuas | Wet Days | Urbanization |
| 42 | Kemijoki | F50 | Erosion |
| 43 | Kizil | F50 | Urbanization |
| 44 | Kolyma | Annual Rainfall | Urbanization |
| 45 | Komoe | Wet Days | Urbanization |
| 46 | Krishna | Annual Rainfall | Rainfall |
| 47 | Kuskokwim | F20 | Snow |
| 48 | Kwanza | Wet Days | Rainfall |
| 49 | Lake_Chad | Wet Days | Urbanization |
| 50 | Lake_Turkana | Wet Days | Urbanization |
| 51 | Lake_Ubsa | F50 | Rainfall |
| 52 | Lena | Rx7day | Urbanization |
| 53 | Limpopo | Annual Rainfall | Erosion |
| 54 | Loire | F50 | Urbanization |
| 55 | Mackenzie | Wet Days | Urbanization |
| 56 | Magdalena | Rx1day | Rainfall |
| 57 | Mahakam | Annual Rainfall | Urbanization |
| 58 | Mahanadi | Annual Rainfall | Urbanization |
| 59 | Mamberamo | Annual Rainfall | Urbanization |
| 60 | Maritsa | F20 | Urbanization |
| 61 | Maroni | Annual Rainfall | Urbanization |
| 62 | Mekong | F50 | Rainfall |
| 63 | Min | Annual Rainfall | Urbanization |
| 64 | Mississippi | Rx1day | Snow |
| 65 | Murghab | F20 | Urbanization |
| 66 | N._Dvina | F20 | Erosion |
| 67 | Narmada | Annual Rainfall | Urbanization |
| 68 | Negro | Wet Days | Rainfall |
| 69 | Neman | Annual Rainfall | Urbanization |
| 70 | Niger | Wet Days | Urbanization |
| 71 | Nile | Annual Rainfall | Urbanization |
| 72 | Ob | Wet Days | Urbanization |
| 73 | Oder | Annual Rainfall | Urbanization |
| 74 | Ogooue | F50 | Urbanization |
| 75 | Okavango | Annual Rainfall | Urbanization |
| 76 | Omo_Wenz | Wet Days | Rainfall |
| 77 | Orange | Wet Days | Rainfall |
| 78 | Orinoco | Rx1day | Urbanization |
| 79 | Po | F50 | Rainfall |
| 80 | Queme | Wet Days | Urbanization |
| 81 | Rhine | Rx7day | Urbanization |
| 82 | Rhone | Rx7day | Rainfall |
| 83 | Rio_Grande | Rx7day | Rainfall |
| 84 | Rufiji | F20 | Erosion |
| 85 | Ruvuma | Wet Days | Erosion |
| 86 | Salween | Annual Rainfall | Urbanization |
| 87 | Sanaga | Annual Rainfall | Urbanization |
| 88 | Santiago_Lerma_Chapala | Wet Days | Urbanization |
| 89 | Saskatchewan_Nelson | Annual Rainfall | Urbanization |
| 90 | Sasquehanna | F50 | Rainfall |
| 91 | Sassandra | Wet Days | Urbanization |
| 92 | Save | Rx7day | Rainfall |
| 93 | Seine | F20 | Urbanization |
| 94 | Senegal | Wet Days | Rainfall |
| 95 | Sepik | Annual Rainfall | Erosion |
| 96 | Si | F50 | Rainfall |
| 97 | St. Lawrence | Annual Rainfall | Rainfall |
| 98 | Stikine | F20 | Urbanization |
| 99 | Syr_Darya | F50 | Urbanization |
| 100 | Tagus | Wet Days | Snow |
| 101 | Tana | F50 | Urbanization |
| 102 | Tapti | Annual Rainfall | Urbanization |
| 103 | Tarim_(Yarkand) | F50 | Urbanization |
| 104 | Terek | Annual Rainfall | Urbanization |
| 105 | Tigris_Euphrates | Wet Days | Urbanization |
| 106 | Tocantins | Wet Days | Rainfall |
| 107 | Tsiribihina | F50 | Rainfall |
| 108 | Uruguay | F20 | Erosion |
| 109 | Usumacinta | Annual Rainfall | Rainfall |
| 110 | Vistula | Annual Rainfall | Urbanization |
| 111 | Volga | F50 | Urbanization |
| 112 | Volta | Wet Days | Urbanization |
| 113 | W._Dvina | Wet Days | Urbanization |
| 114 | Yangtze | Rx1day | Urbanization |
| 115 | Yaqui | F20 | Urbanization |
| 116 | Yenisey | F20 | Urbanization |
| 117 | Yukon | F50 | Rainfall |
| 118 | Zaire | Annual Rainfall | Urbanization |
| 119 | Zambezi | Annual Rainfall | Rainfall |

# Calculation of floodplain soil erosion

We have used the Revised Universal Soil Loss Equation (RUSLE) equation to estimate average-annual soil erosion potential within the floodplains of the selected river basins,

A = R *K *LS *C *P (1)

where A is represented as the average SE potential (t ha-1 yr-1), R is the rainfall erosivity factor (MJ mm ha−1 h−1 yr−1), K is the soil erodibility factor (t h MJ−1 mm−1), LS is the dimensionless slope length and steepness factor, C is the cover-management factor, and P is the support-practice factor. After calculating RUSLE soil erosion potential, these maps were delineated using the recent GFPLAIN250m dataset floodplain extent for each river basin, and the spatial mean soil erosion was calculated to derive annual basin-scale erosion time series.

The R factor is often calculated from the kinetic energy of rainfall and its maximum 30-min intensity (*EI*30) 1–3. But these data are rarely available in large geographical regions 4. Therefore, some alternative methods have been applied to calculate the R factor using more readily available data, such as daily, monthly, or annual rainfall 1,5–7. 8 used the RWm model with monthly precipitation data from 112 stations to derive rainfall erosivity (R), computed as follows.

R = 17.35 × 10 (1.5 log10(MFI) − 0.8188) (2)

MFI = , (3)

where Pi is the monthly rainfall, and P is the total annual rainfall.

The remaining RUSLE factors (K, LS, C, and P) were adopted from the global RUSLE database developed by Borrelli et al 2017. Authors validated the evaluated potential soil erosion (“A” in t ha-1 yr-1) using independent field observations of soil erosion collected from multiple climatic and physiographic regions worldwide. Hence, this study used the published RUSLE dataset (for the years 2001 and 2012) as an independent benchmark to evaluate the consistency of the potential erosion estimates.

Mean floodplain erosion was calculated for each of the 119 major river basins by averaging erosion values within mapped floodplain areas. After that, corresponding basin-averaged soil loss values for the were independently extracted from the published global RUSLE dataset for the reference years 2001 and 2012 using the same basin boundaries. For comparing these dataset **Spearman rank correlation coefficients (ρ)** was estimated separately for 2001 and 2012 using 119 major river basins.


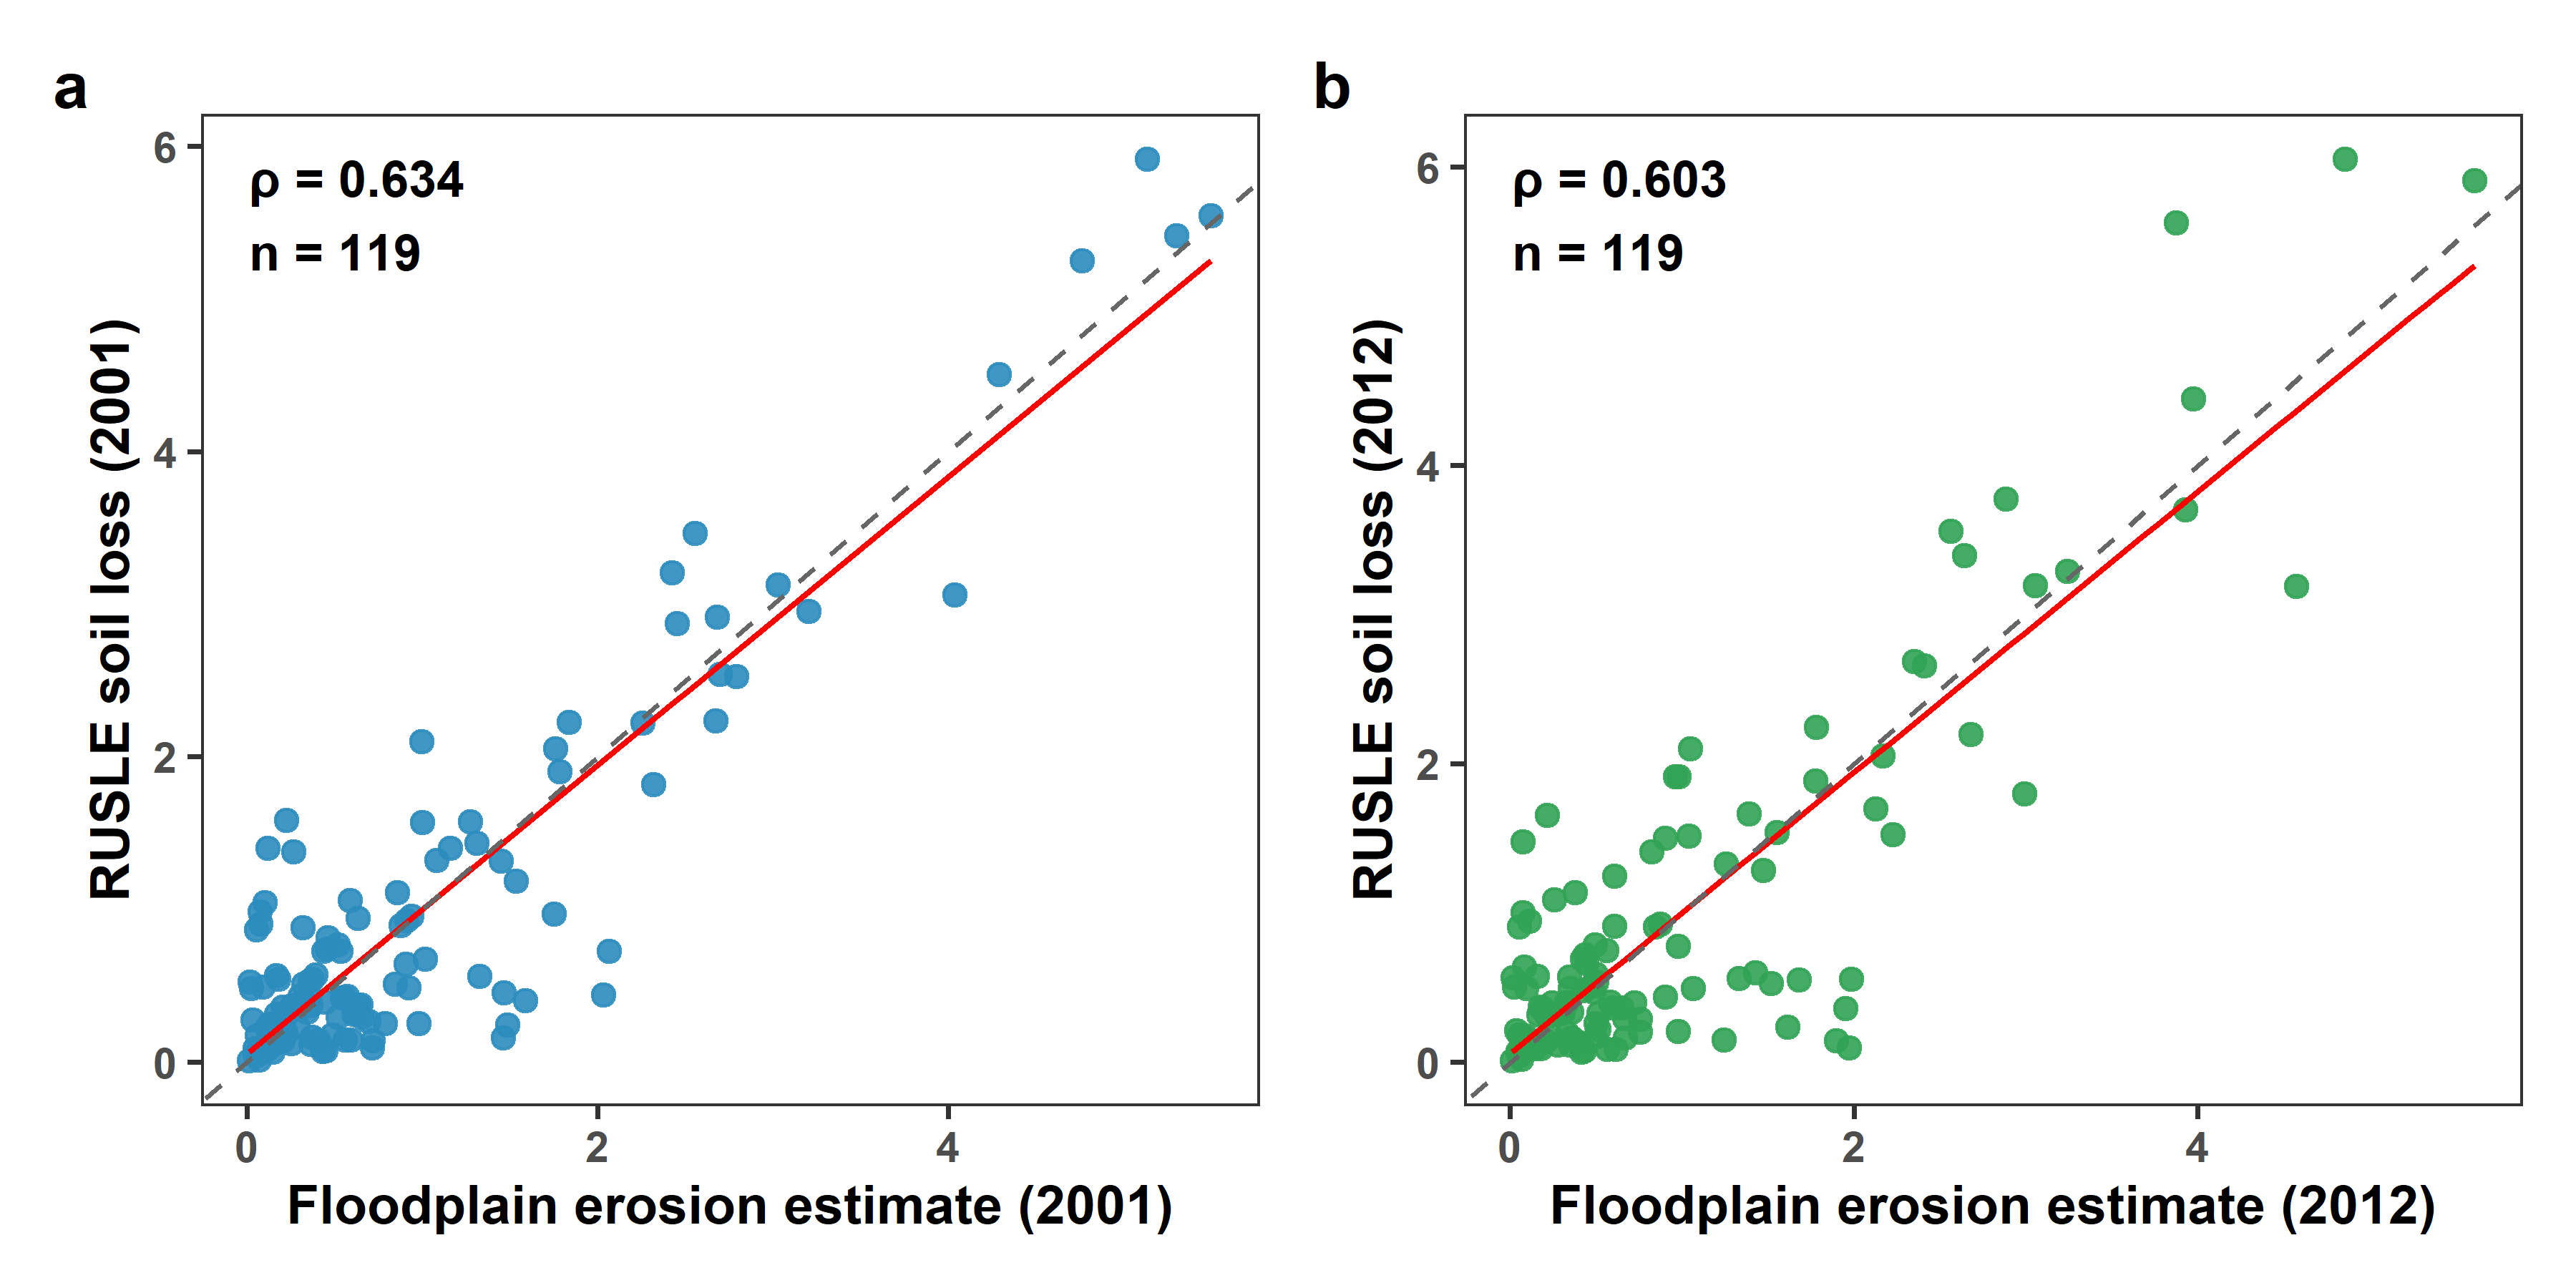


**Fig Supplementary_8:** **Validation of floodplain erosion.** Scatterplots comparing basin-scale global potential floodplain erosion estimated in this study with independent RUSLE-derived soil loss estimates for **(a)** 2001 and **(b)** 2012. Here, each point represents an individual river basin (*n* = 119), with the red solid line indicating the least-squares linear regression. Spearman's correlation coefficients were estimated, supporting the reliability of the potential floodplain soil erosion estimates derived in this study (*r* = 0.634 for 2001 and *r* = 0.603 for 2012).


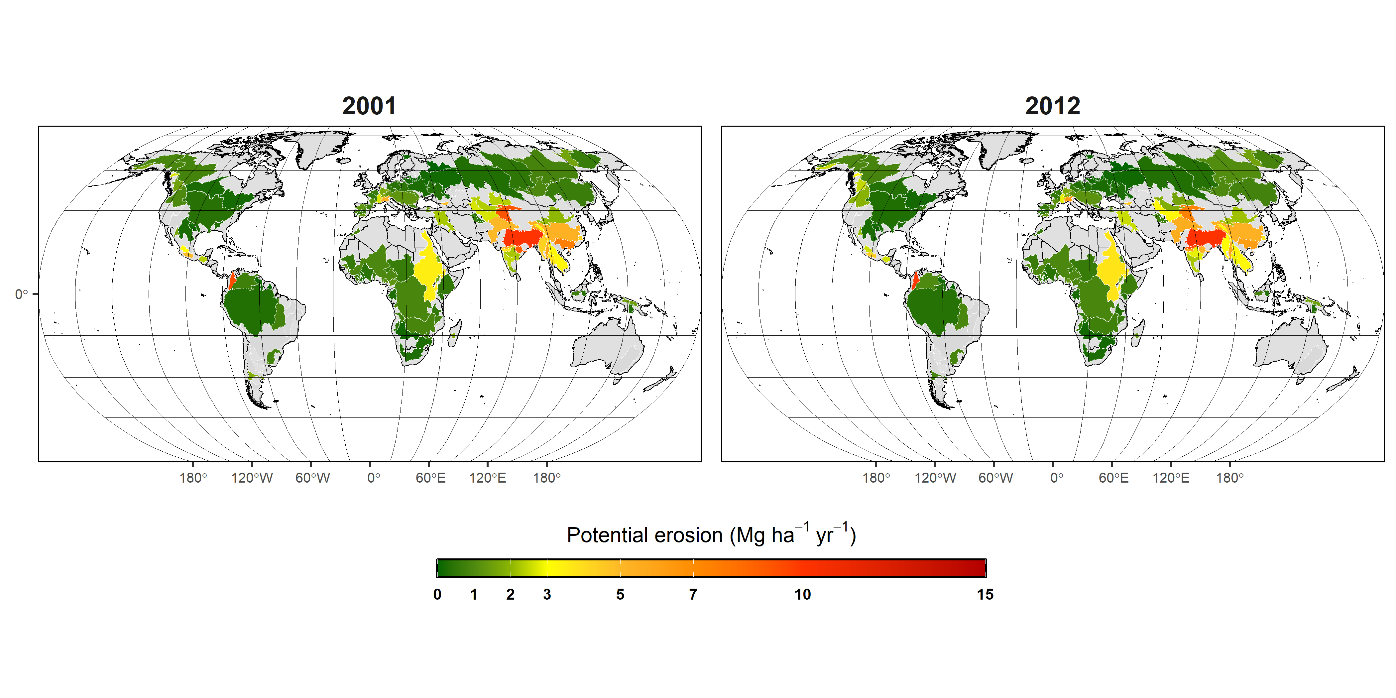


**Fig Supplementary_9:** **Spatial distribution of estimated floodplain potential erosion (t ha-1 yr-1) across major river basins.**

# References

1. Renard, K. G. ., Foster, G. R. ., Weesies, G. A. ., McCool, D. K. . & Yoder, D. C. . *Predicting Soil Erosion by Water : A Guide to Conservation Planning with the Revised Universal Soil Loss Equation (RUSLE)*. (U.S. Department of Agriculture, Agricultural Research Service ; U.S. Government Printing Office, 1997).

2. De, N., Loureiro, S., De, M. & Coutinho, A. *A New Procedure to Estimate the RUSLE EI 30 Index, Based on Monthly Rainfall Data and Applied to the Algarve Region, Portugal*. www.elsevier.com/locate/jhydrol.

3. Shamshad, A., Azhari, M. N., Isa, M. H., Hussin, W. M. A. W. & Parida, B. P. Development of an appropriate procedure for estimation of RUSLE EI30 index and preparation of erosivity maps for Pulau Penang in Peninsular Malaysia. *Catena (Amst).* **72**, 423–432 (2008).

4. Panagos, P. *et al.* Global rainfall erosivity assessment based on high-temporal resolution rainfall records. *Sci. Rep.* **7**, (2017).

5. Li, P. *et al.* Determining the drivers and rates of soil erosion on the Loess Plateau since 1901. *Science of the Total Environment* **823**, (2022).

6. Xiong, M. & Leng, G. Global soil water erosion responses to climate and land use changes. *Catena* vol. 241 Preprint at https://doi.org/10.1016/j.catena.2024.108043 (2024).

7. Pan, J. & Wen, Y. Estimation of soil erosion using RUSLE in Caijiamiao watershed, China. *Natural Hazards* **71**, 2187–2205 (2014).

8. Arnoldus. *A 1.76 537 1 1 8 8 2 PREDICTING RAINFALL EROSION LOSSES A GUIDE TO CONSERVATION PLANNING UNIVERSITY OF VIRGINIA LIBRARY I N I A X001754985 UNITED STATES DEPARTMENT OF AGRICULTURE AGRICULTURE*. (1977).
